# Supplementary material
Source: Springer Nature journal article supplement (https://www.springermedizin.de/resource/supplementary/13048_2009_29_MOESM3_ESM.pdf/9664740)

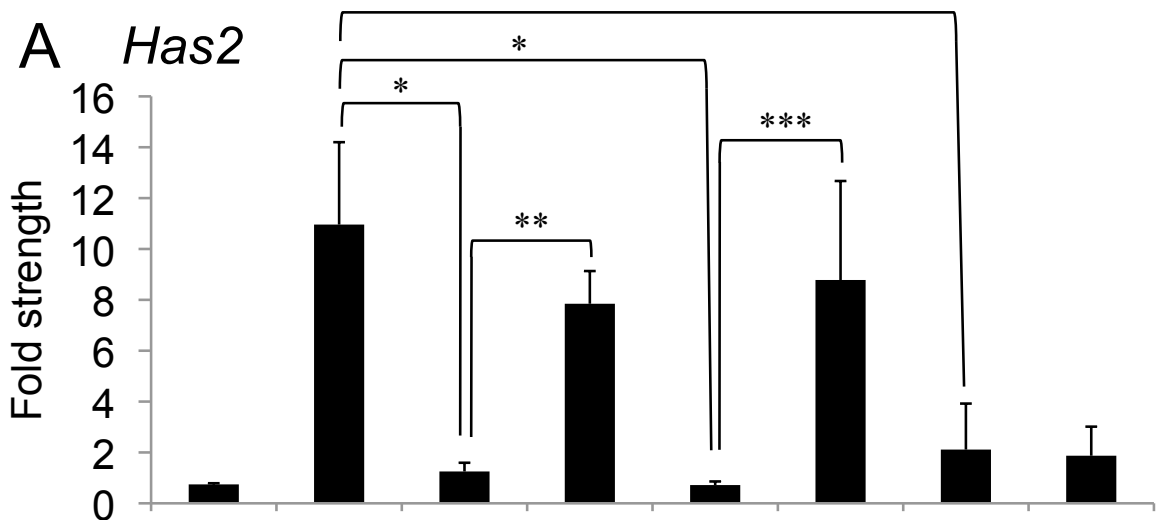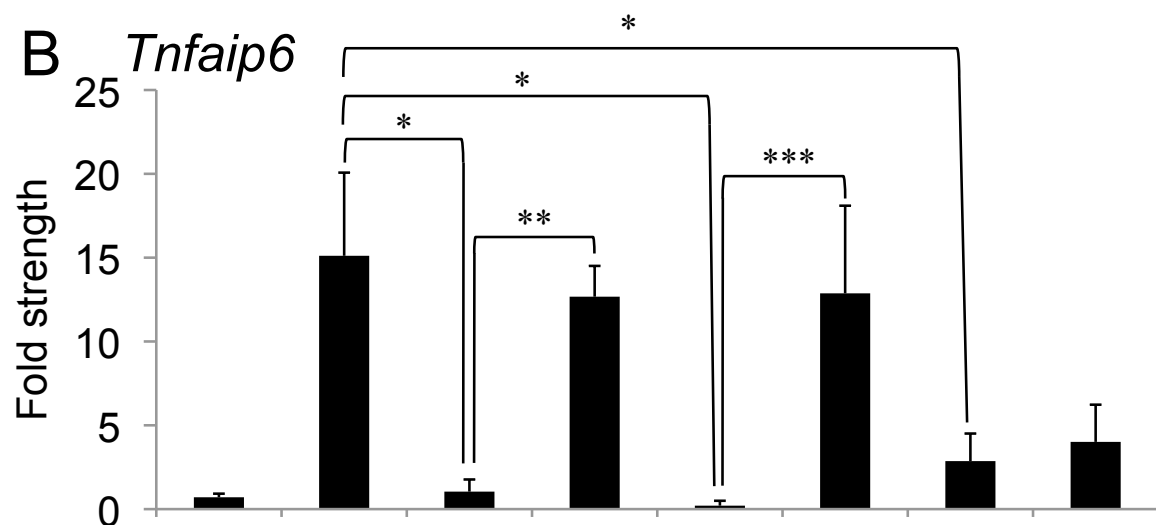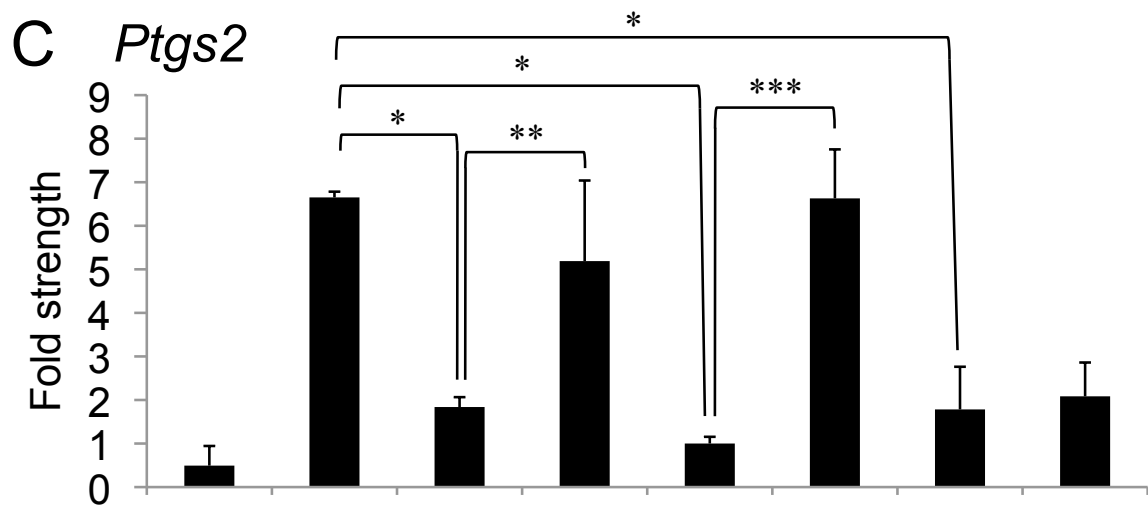

FSH+LH

-

+

+

+

+

+

+

+

EGF

-

-

-

+

-

+

-

+

+H89

+SB

+U0126

Supplement: MOESM3 [file 9664740]
